# Supplementary material
Source: PubMed Central journal article supplement (PMC4108519)
Supplement: NIHMS593948-supplement-01.pdf [file NIHMS593948-supplement-01.pdf]

# **Novel *SCN5A* Mutation in Amiodarone-responsive Multifocal Ventricular Ectopy-associated Cardiomyopathy**

Thomas M. Beckermann, B.S., Karen McLeod, M.D., Victoria Murday, M.D., Franck Potet, Ph.D., and Alfred. L. George, Jr. M.D.

## **SUPPLEMENTAL INFORMATION**

### ***Supplemental Figures:***

**Fig. S1 - Additional electrocardiographic recordings of the proband.**

**Fig. S2 - Echocardiographic images of the proband.**

**Fig. S3 - Activation and inactivation of R225P.**

**Fig. S4 - Ramp-current analysis.**

**Fig. S5 - Frequency-dependent rundown.**

**Fig. S6 - Biophysical properties of Na<sub>v</sub>1.5-R225Q.**

**Fig. S7 - Window-currents.**

**Fig. S8 - Effects of amiodarone on Na<sub>v</sub>1.5-R225P.**

### ***Supplemental Tables:***

**Table S1 - Biophysical properties of WT-Na<sub>v</sub>1.5 and mutant channels.**

**Table S2 - Frequency-dependent rundown and slow inactivation properties of WT-Na<sub>v</sub>1.5 and R225P.**

**Table S3 - Effects of amiodarone on WT-Na<sub>v</sub>1.5 and R225P channels.**

**A. Age 3 days**

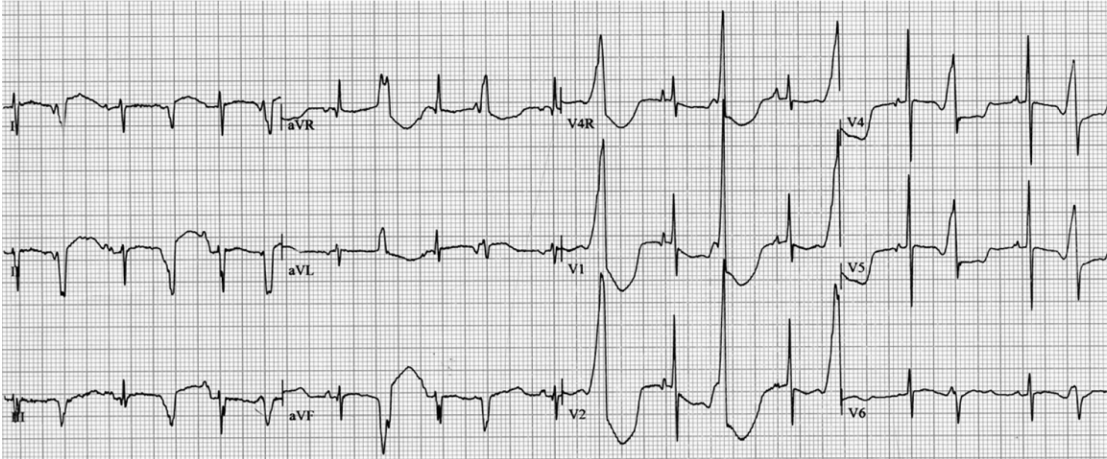

**B. Age 7 weeks**

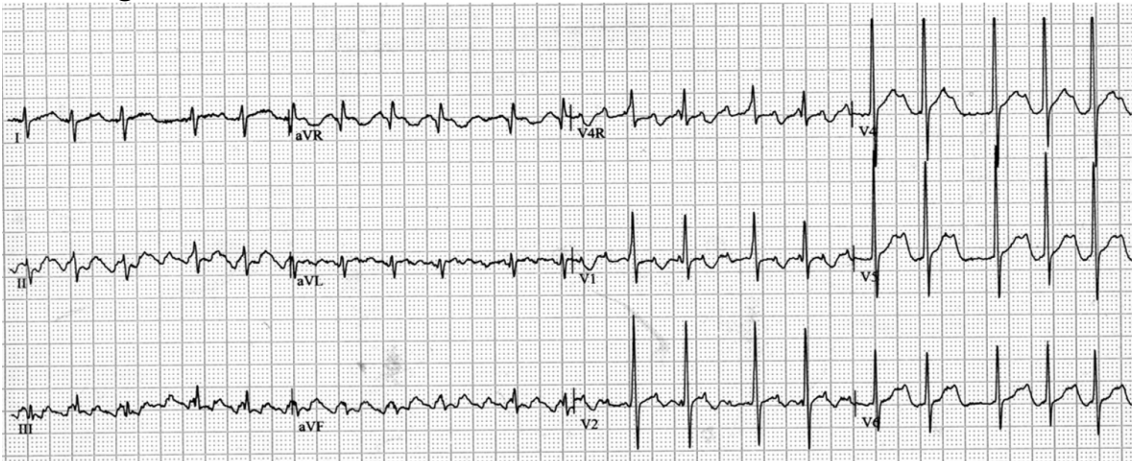

**C. Age 6.5 months**

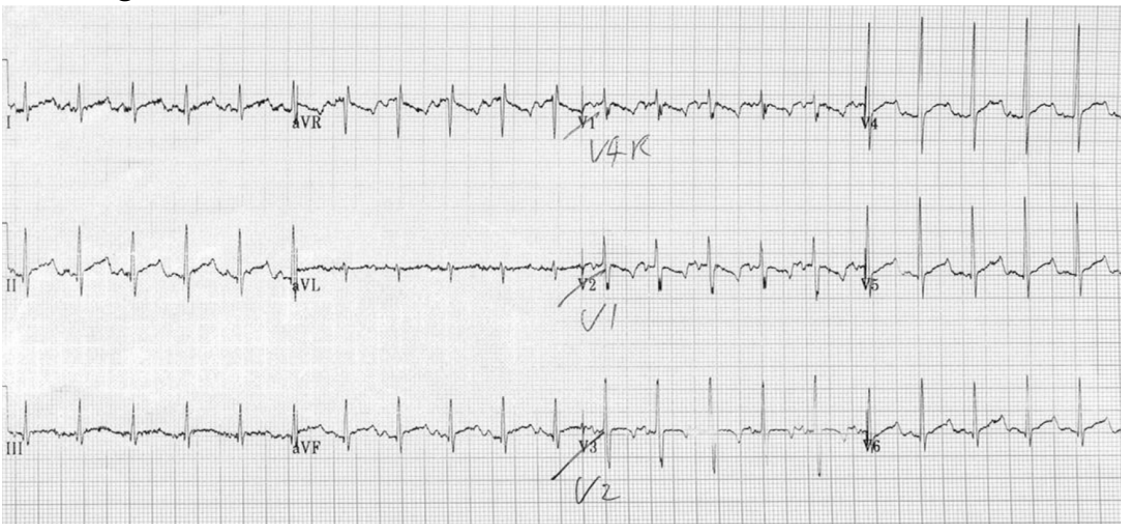

**Supplemental Fig. S1.** Additional electrocardiographic recordings of the proband.

### D. Age 9 months

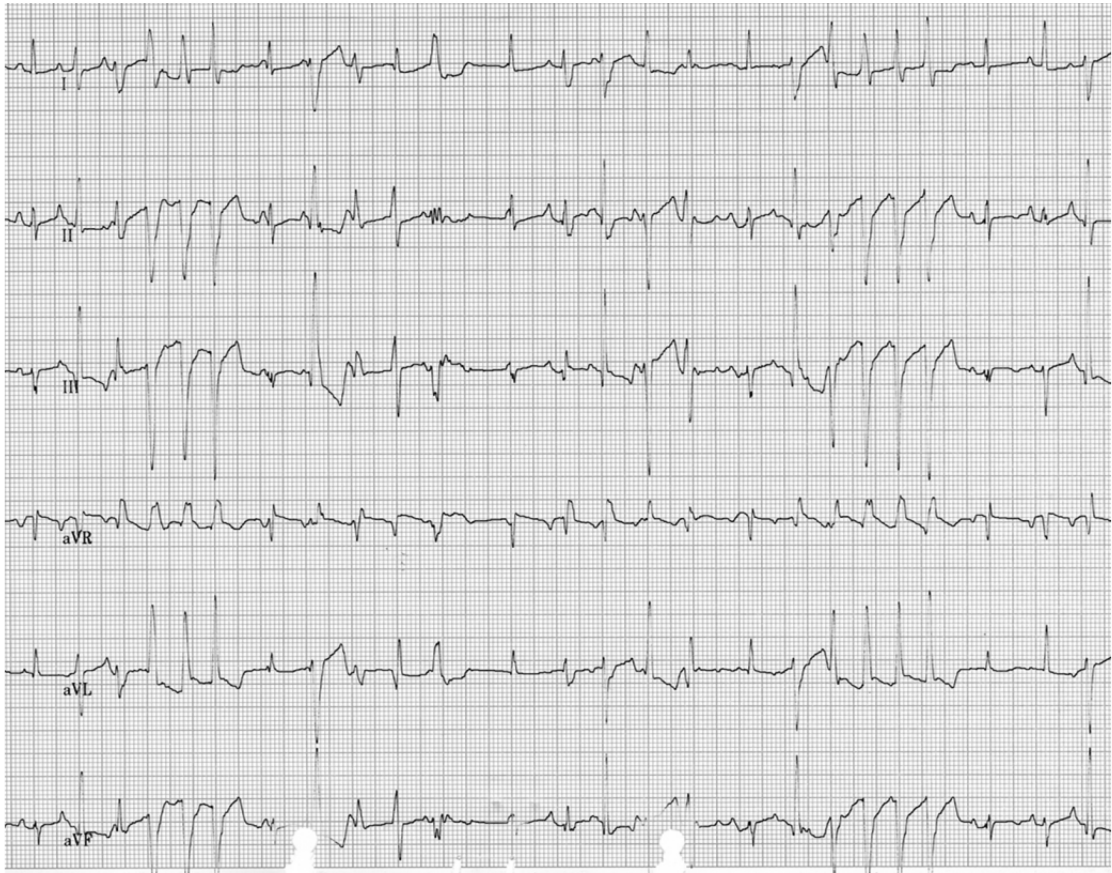

### E. Age 20 months

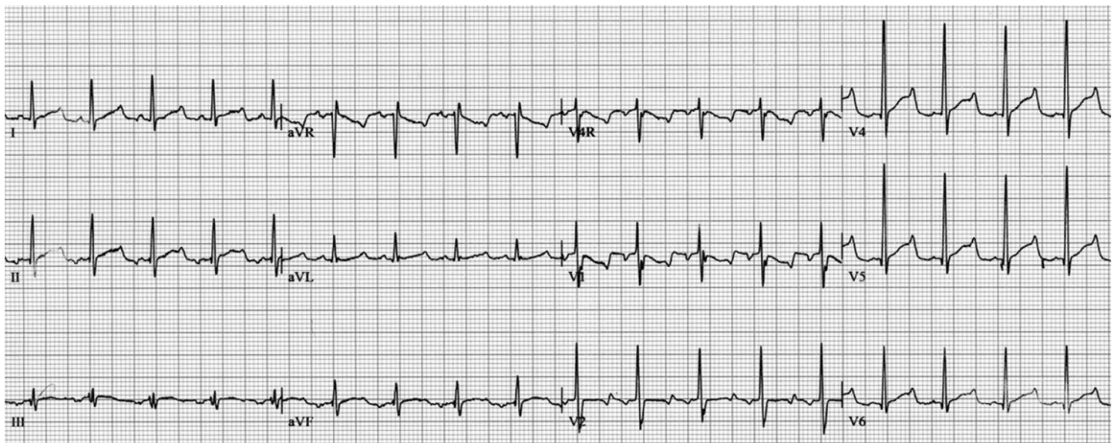

**Supplemental Fig. S1.** Additional electrocardiographic recordings of the proband.

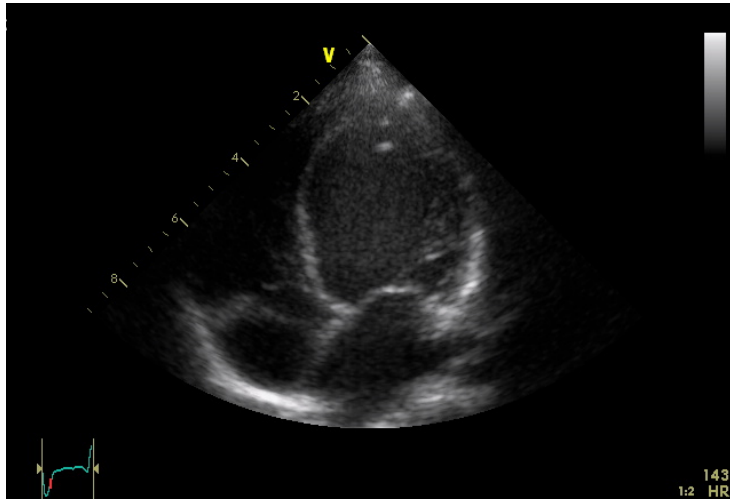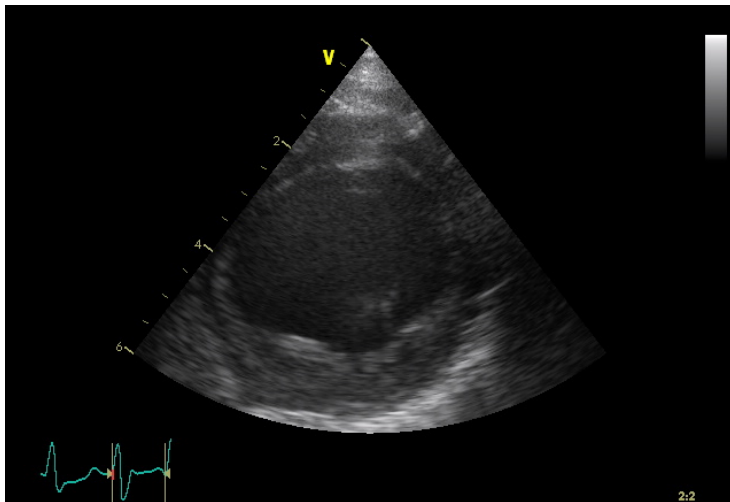

**Supplemental Fig. S2.** Echocardiographic images of the proband (weight 8.4 kg, height 69 cm) illustrating dilation of all cardiac chambers.



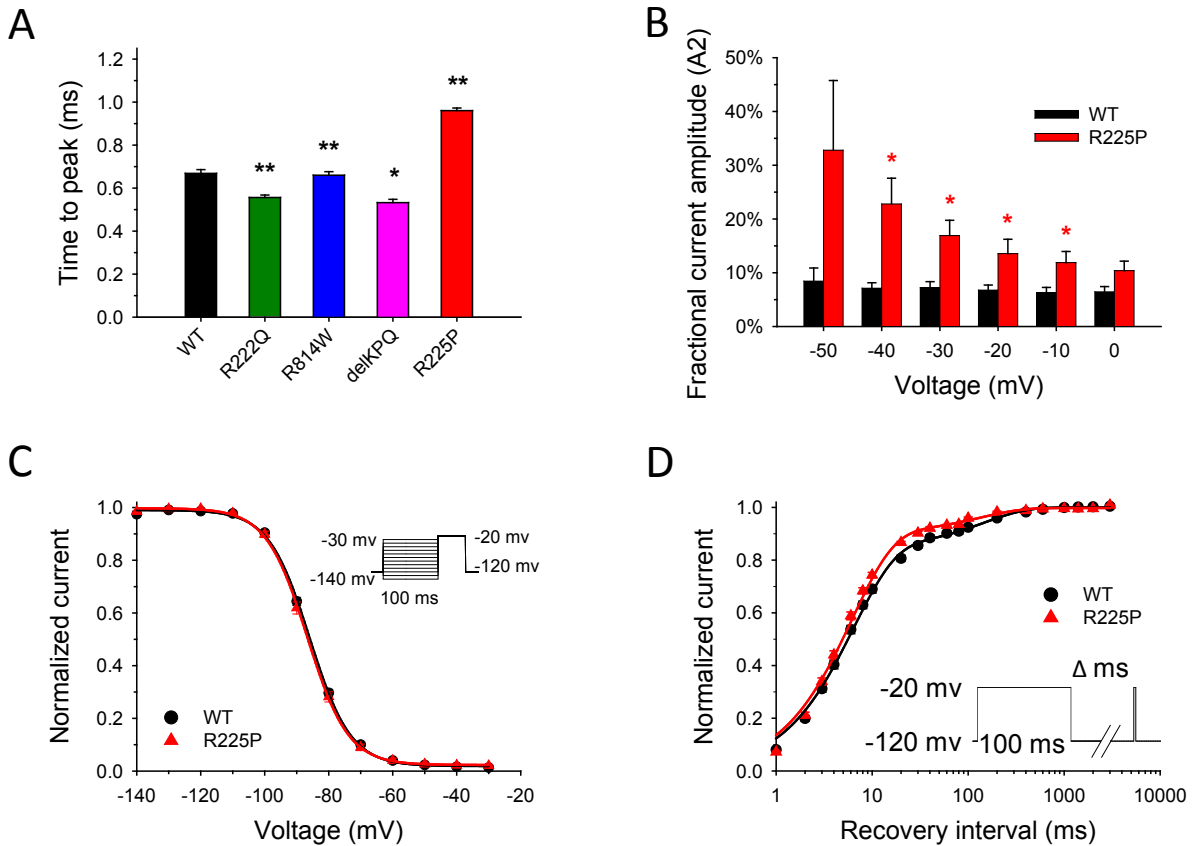

**Supplemental Fig. S3. Activation and inactivation of R225P.** (A) Activation kinetics measured as time to peak current derived from activating pulses to -20mV (holding potential -120mV) for WT and mutant channels. (B) Percentage of current inactivation associated with the slow component (time constant,  $\tau_2$ ) of current decay for WT and R225P. (C) Channel availability of WT and R225P. (D). Recovery from fast inactivation. All data are represented as mean  $\pm$  S.E.M. for n= 8 - 9 cells.

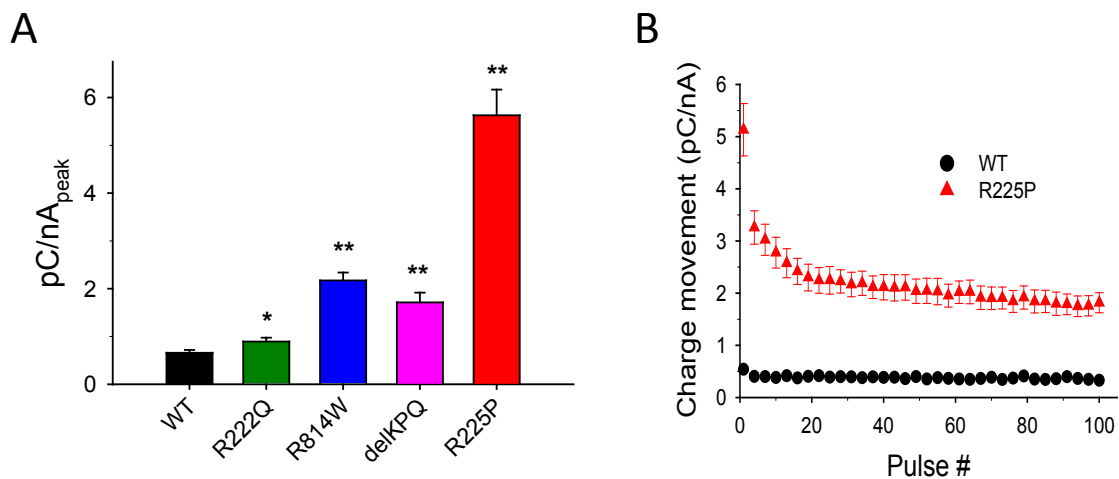

**Supplemental figure S4. Ramp-current analysis.** (A) Net charge movement during slow voltage-ramps of WT and mutant channels. (B) Charge movement in response to consecutive 500 ms ramp-current protocols (1.1 Hz; 100 pulses). All data are represented as mean  $\pm$  S.E.M. for  $n = 7 - 16$  cells.

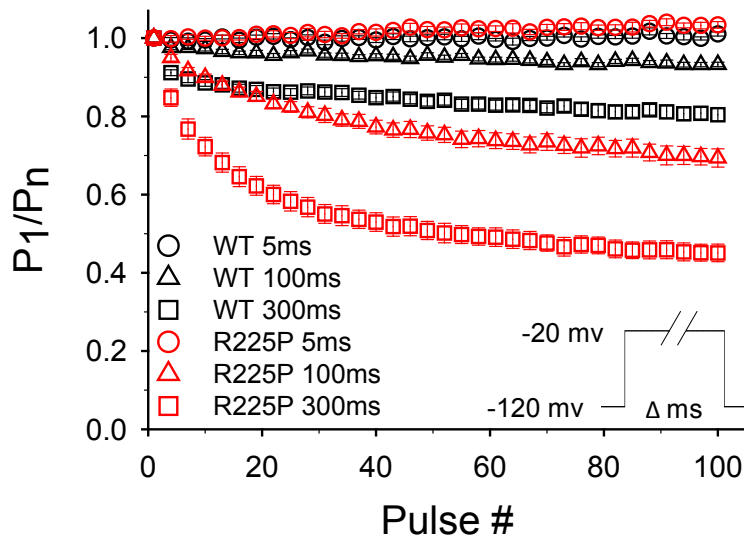

**Supplemental Fig. S5. Frequency-dependent rundown.** Pulse trains (2Hz; -20mV) illustrated for WT (black) and R225P (red) channels with activating pulses of 5 ms (open circles), 100 ms (open triangles), or 300 ms (open square). All data are represented as mean  $\pm$  S.E.M. for  $n = 11 - 15$  cells.

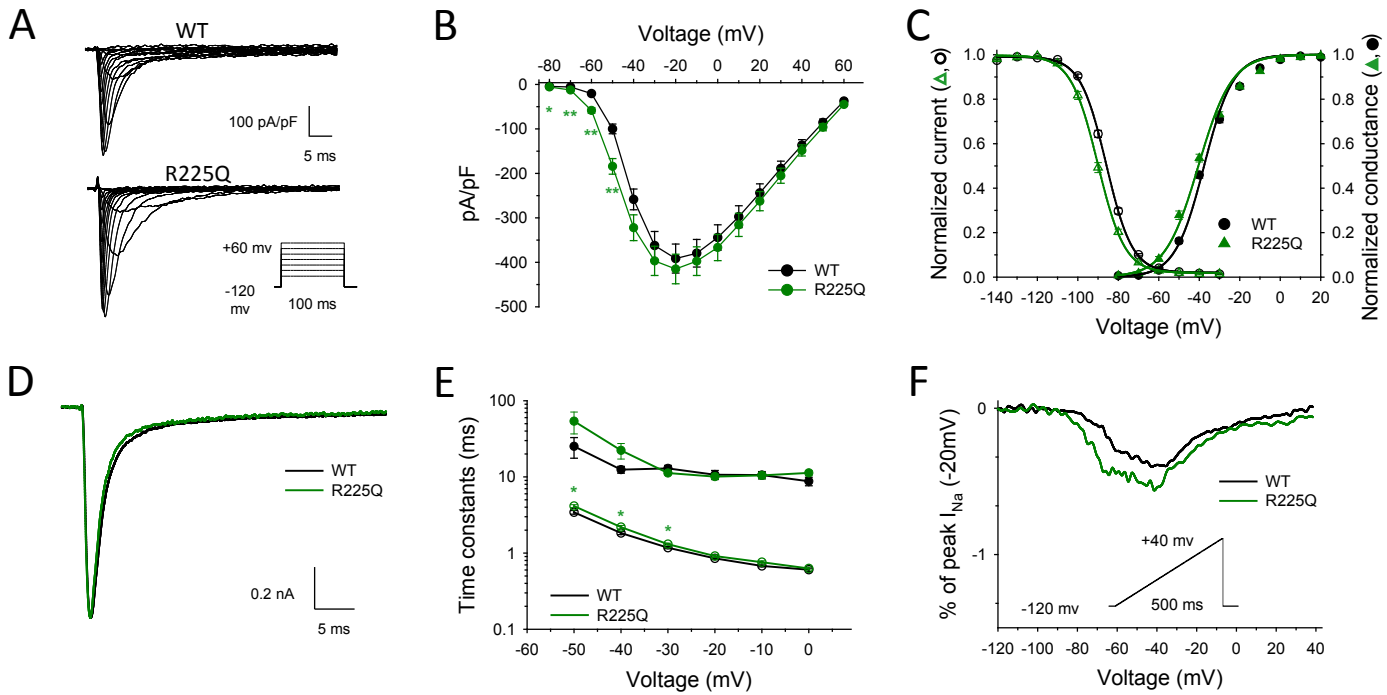

**Supplemental Fig. S6. Biophysical properties of  $Na_v1.5$ -R225Q.** (A) Representative traces of WT (top) and R225Q (bottom) sodium channels. (B) Current-density/voltage plots of WT and R225Q. (C) Voltage dependence of activation and channel availability for WT and R225Q. (D) Representative traces of WT and R225Q at -20 mV. (E) Voltage-dependence of inactivation time constants (open symbols represent fast component; closed symbols represent slow component) for WT and R225Q. (F) Normalized TTX-subtracted average ramp-currents (0.32 mV/ms) of WT and R225Q measured as a percentage of peak  $I_{Na}$  (-20 mV). All data are represented as mean  $\pm$  S.E.M for  $n = 7 - 15$  cells.

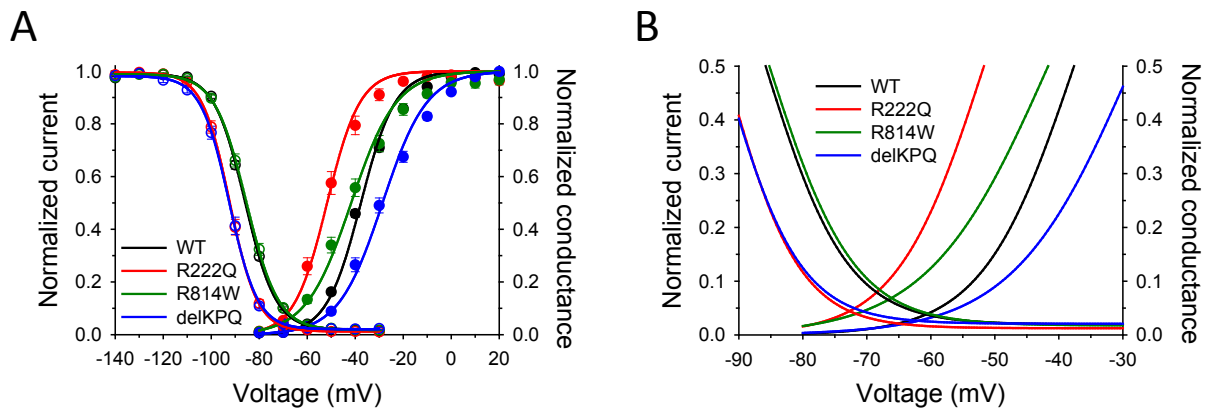

**Supplemental Fig. S7. Window-currents.** (A) Overlay of Boltzmann-fitted conductance – voltage (filled symbols) and channel availability (open symbols) curves of WT and mutations R222Q, R814W, and delKPQ. (B) Panel A enhanced to emphasize window-currents. All data are represented as mean  $\pm$  S.E.M. for  $n = 7 - 12$  cells.

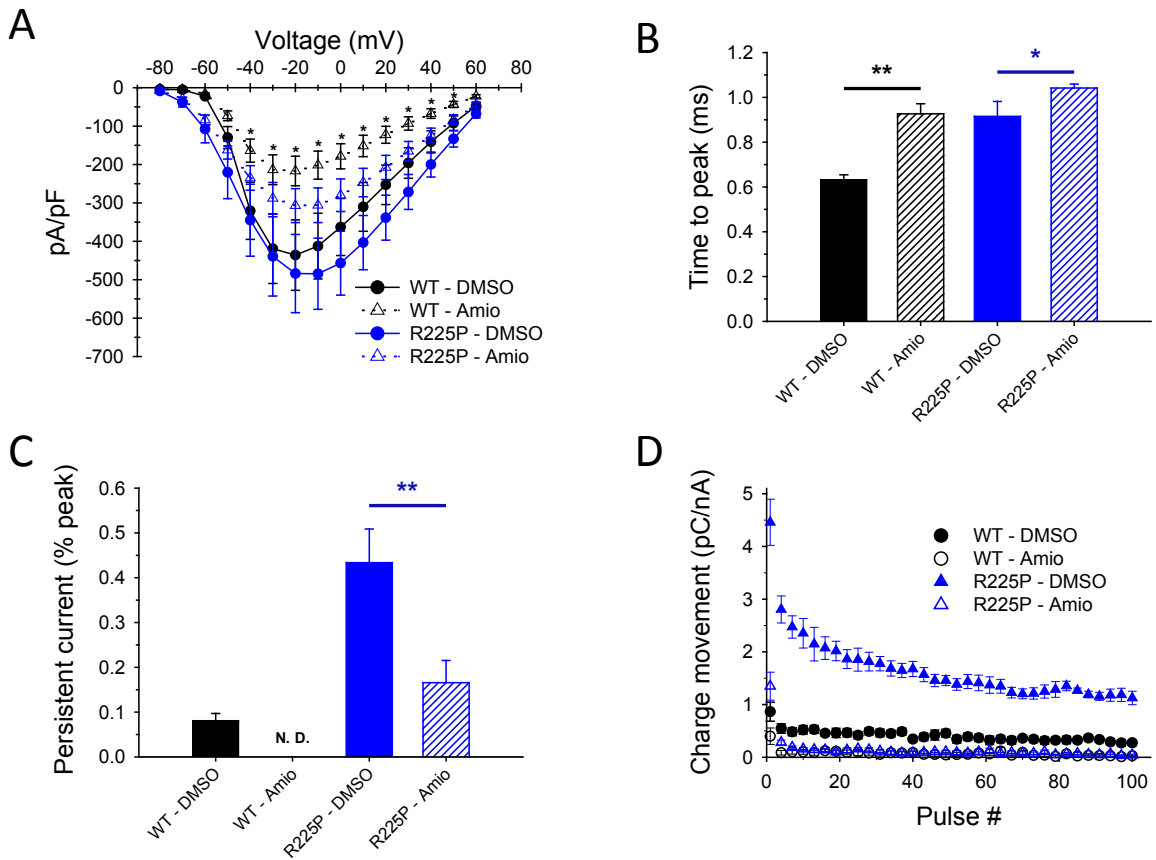

**Supplemental Fig S8. Effects of amiodarone on Na<sub>v</sub>1.5-R225P.** (A) Current-density – voltage plots of WT and R225P channels in the presence of 0.01% DMSO (control, solid symbols) or amiodarone (open symbols). (B) Activation kinetics measured as time to peak current following an activation pulse to -20 mV (holding potential -120 mV). (C) Persistent current as a percentage of peak  $I_{Na}$  from WT and R225P in the presence of DMSO or amiodarone. WT persistent current non-determinable (N. D.) in the presence of amiodarone. (D) Charge movement in response to consecutive 500 ms ramp-current protocols (1.1 Hz; 100 pulses) in DMSO (closed symbols) and amiodarone (open symbols) for WT (black circles) and R225P blue (triangles).



**Table S1: Biophysical properties of WT-Nav1.5 and mutant channels.**

|                                          |                     | WT            | R225P           | R222Q           | R814W           | R225Q          | delKPQ          |
|------------------------------------------|---------------------|---------------|-----------------|-----------------|-----------------|----------------|-----------------|
| <b>Activation</b>                        | $V_{1/2}$           | -37.3 ± 0.6   | -37.1 ± 1.0     | -51.2 ± 1.5**   | -41.1 ± 1.6*    | -40.2 ± 0.7*   | -28.4 ± 1.2**   |
|                                          | $k$                 | 8.4 ± 0.2     | 12.3 ± 0.3**    | 7.6 ± 0.4       | 10.7 ± 0.4**    | 9.8 ± 0.2**    | 10.4 ± 0.1**    |
|                                          | $n$                 | 14            | 11              | 13              | 15              | 13             | 12              |
| <b>Inactivation</b>                      | $V_{1/2}$           | -86.0 ± 0.4   | -86.8 ± 0.6     | -92.7 ± 0.8**   | -84.9 ± 0.8     | -90.2 ± 0.6**  | -92.5 ± 0.8**   |
|                                          | $k$                 | -6.4 ± 0.1    | -6.3 ± 0.1      | -5.6 ± 0.1**    | -6.5 ± 0.2      | -6.6 ± 0.2     | -5.6 ± 0.1**    |
|                                          | $n$                 | 11            | 10              | 14              | 14              | 10             | 14              |
| <b>Window-current peak</b>               | <b>Voltage</b>      | -60.4 ± 0.4   | -67.0 ± 1.2**   | -74.7 ± 0.4**   | -65.3 ± 0.9**   | -65.6 ± 0.7**  | -60.7 ± 1.5     |
|                                          | <b>Activity</b>     | 0.037 ± 0.001 | 0.063 ± 0.002** | 0.050 ± 0.002** | 0.064 ± 0.003** | 0.038 ± 0.002  | 0.025 ± 0.002** |
|                                          | $n$                 | 10            | 7               | 8               | 12              | 11             | 10              |
| <b>Time to peak (-20 mV)</b>             | <b>Peak (ms)</b>    | 0.67 ± 0.02   | 0.96 ± 0.01**   | 0.56 ± 0.01**   | 0.66 ± 0.02     | 0.75 ± 0.03*   | 0.53 ± 0.02**   |
|                                          | $n$                 | 18            | 10              | 7               | 7               | 14             | 8               |
| <b>Recovery from fast inactivation</b>   | <b>A1</b>           | 0.85 ± 0.01   | 0.90 ± 0.01*    | 0.87 ± 0.02     | 0.88 ± 0.01     | 0.85 ± 0.02    | 0.86 ± 0.02     |
|                                          | $\tau_1$            | 6.5 ± 0.3     | 6.2 ± 0.3       | 7.0 ± 0.3       | 6.8 ± 0.5       | 7.8 ± 0.7      | 4.9 ± 0.2**     |
|                                          | <b>A2</b>           | 0.15 ± 0.01   | 0.10 ± 0.01**   | 0.14 ± 0.02     | 0.11 ± 0.01*    | 0.15 ± 0.02    | 0.14 ± 0.02     |
|                                          | $\tau_2$            | 178 ± 18      | 147 ± 14        | 153 ± 17        | 190 ± 29        | 209 ± 289      | 265 ± 49        |
|                                          | $n$                 | 18            | 9               | 10              | 8               | 8              | 10              |
| <b>500ms Ramps</b>                       | <b>Peak (mV)</b>    | 45.7 ± 2.7    | -57.1 ± 3.0*    | -70.9 ± 0.9**   | -64.9 ± 1.4**   | -56.7 ± 3.4*   | -35.0 ± 1.9*    |
|                                          | <b>% peak</b>       | -0.60 ± 0.04  | -4.9 ± 0.3**    | -1.0 ± 0.1**    | -2.4 ± 0.1**    | -0.9 ± 0.1**   | -1.0 ± 0.1**    |
|                                          | <b>Area (pC/nA)</b> | 0.66 ± 0.1    | 5.86 ± 0.6**    | 0.89 ± 0.1      | 2.17 ± 0.2**    | 1.01 ± 0.2     | 1.71 ± 0.2**    |
|                                          | $n$                 | 15            | 11              | 8               | 7               | 12             | 8               |
| <b>Ramp-current activation threshold</b> | <b>Voltage</b>      | -77.2 ± 1.2   | -96.5 ± 1.2**   | -97.3 ± 1.6**   | -95.4 ± 2.3**   | -86.42 ± 1.6** | -68.5 ± 1.2**   |
|                                          | $n$                 | 13            | 16              | 8               | 7               | 11             | 7               |
| <b>Persistent <math>I_{Na}</math></b>    | <b>% peak</b>       | 0.13 ± 0.02   | 0.87 ± 0.06**   | 0.09 ± 0.03     | 0.17 ± 0.03     | 0.24 ± 0.03*   | 0.65 ± 0.04**   |
|                                          | $n$                 | 18            | 10              | 7               | 7               | 14             | 8               |

**Versus WT**

\* = P < 0.05

\*\* = P < 0.005

Table S2: Frequency-dependent rundown and slow inactivation properties of WT-Nav1.5 and R225P.

|                                                   |                     | WT                   |                     | R225P            |    |
|---------------------------------------------------|---------------------|----------------------|---------------------|------------------|----|
| Frequency dependent rundown<br>2 Hz               | 5 ms pulse length   | $P_1/P_{100}$<br>$n$ | 1.01 ± 0.01<br>11   | 1.03 ± 0.01*     | 12 |
|                                                   | 100 ms pulse length | $P_1/P_{100}$<br>$n$ | 0.93 ± 0.01<br>15   | 0.69 ± 0.02**    | 15 |
|                                                   | 300 ms pulse length | $P_1/P_{100}$<br>$n$ | 0.80 ± 0.02<br>14   | 0.47 ± 0.02**    | 12 |
| Onset of slow inactivation                        |                     | $A1$                 | 0.21 ± 0.03         | 0.21 ± 0.04      |    |
|                                                   |                     | $\tau_1$             | 314.1 ± 41.5        | 373.3 ± 81.5     |    |
|                                                   |                     | $A2$                 | 0.45 ± 0.04         | 0.7 ± 0.04**     |    |
|                                                   |                     | $\tau_2$             | 9973.5 ± 1601.2     | 10321.1 ± 224.5  |    |
|                                                   |                     | $y0$                 | 0.32 ± 0.02         | 0.08 ± 0.003**   |    |
|                                                   |                     | $n$                  | 8                   | 7                |    |
| Recovery from inactivation<br>(500 ms pre-pulse)  |                     | $A1$                 | 0.82 ± 0.01         | 0.83 ± 0.01      |    |
|                                                   |                     | $\tau_1$             | 8.3 ± 0.6           | 7.3 ± 0.7        |    |
|                                                   |                     | $A2$                 | 0.17 ± 0.01         | 0.13 ± 0.01*     |    |
|                                                   |                     | $\tau_2$             | 219.6 ± 22.5        | 185.71 ± 24.29   |    |
|                                                   |                     | $n$                  | 10                  | 9                |    |
| Recovery from slow inactivation<br>(3s pre-pulse) |                     | $A1$                 | 0.69 ± 0.01         | 0.63 ± 0.02*     |    |
|                                                   |                     | $\tau_1$             | 10.1 ± 0.9          | 14.0 ± 1.1*      |    |
|                                                   |                     | $A2$                 | 0.31 ± 0.01         | 0.35 ± 0.02      |    |
|                                                   |                     | $\tau_2$             | 352.3 ± 24.4        | 2261.9 ± 251.8** |    |
|                                                   |                     | $n$                  | 9                   | 9                |    |
| Voltage dependence of slow inactivation           |                     | $V_{1/2}$            | -68.9 ± 5.2         | -83.5 ± 0.8*     |    |
|                                                   |                     | $k$                  | -32.9 ± 2.2         | -12.0 ± 0.4**    |    |
|                                                   |                     | $n$                  | 8                   | 8                |    |
| 1.1 Hz ramp train<br>( $P_{100}$ )                | Area (pC/nA)<br>$n$ | 0.33 ± 0.04<br>8     | 1.82 ± 0.19**<br>13 |                  |    |

**Versus WT**

\* = P < 0.05

\*\* = P < 0.005

Table S3: Effects of amiodarone on WT-Nav1.5 and R225P channels.

| Amiodarone (3μM)                  |                     | WT - DMSO     | WT - Amio       | R225P - DMSO    | R225P - Amio           |                      |
|-----------------------------------|---------------------|---------------|-----------------|-----------------|------------------------|----------------------|
| Activation                        | $V_{1/2}$           | -40.4 ± 1.1   | -41.4 ± 0.7     | -34.5 ± 1.5*    | <b>-41.0 ± 1.2</b>     |                      |
|                                   | $k$                 | 6.7 ± 0.3     | 6.8 ± 0.2       | 11.1 ± 0.5**    | 10.7 ± 0.4**           |                      |
|                                   | $n$                 | 7             | 11              | 6               | 10                     |                      |
| Inactivation                      | $V_{1/2}$           | -85.0 ± 0.8   | -92.2 ± 1.8**   | -85.2 ± 1.1     | <b>-91.6 ± 1.9*</b>    |                      |
|                                   | $k$                 | -6.2 ± 0.1    | -10.1 ± 0.7**   | -6.8 ± 0.2*     | <b>-10.8 ± 0.7**</b>   |                      |
|                                   | $n$                 | 8             | 10              | 8               | 12                     |                      |
| Window-currents                   | <b>Voltage</b>      | -61.00 ± 0.03 | -61.6 ± 0.7     | -63.2 ± 1.8     | <b>-68.0 ± 1.3**</b>   |                      |
|                                   | <b>Activity</b>     | 0.034 ± 0.001 | 0.044 ± 0.002** | 0.072 ± 0.004** | <b>0.093 ± 0.003**</b> |                      |
|                                   | $n$                 | 5             | 7               | 7               | 9                      |                      |
| Recovery from inactivation        | $A1$                | 0.87 ± 0.01   | 0.19 ± 0.07**   | 0.88 ± 0.02     | <b>0.13 ± 0.03**</b>   |                      |
|                                   | $\tau_1$            | 8.0 ± 1.1     | 6.8 ± 2.7       | 10.3 ± 1.0      | 5.6 ± 1.4              |                      |
|                                   | $A2$                | 0.13 ± 0.01   | 1.03 ± 0.06**   | 0.12 ± 0.02     | <b>1.04 ± 0.05**</b>   |                      |
|                                   | $\tau_2$            | 217 ± 36      | 2130 ± 434**    | 245 ± 39        | <b>1940 ± 293**</b>    |                      |
|                                   | $n$                 | 7             | 8               | 8               | 8                      |                      |
| Persistent $I_{Na}$               | <b>% peak</b>       | 0.08 ± 0.02   | -0.15 ± 1.16    | 0.43 ± 0.08**   | <b>0.17 ± 0.05</b>     |                      |
|                                   | $n$                 | 5             | 8               | 8               | 7                      |                      |
| Time to peak (-20 mV)             | <b>Peak (ms)</b>    | 0.63 ± 0.02   | 0.93 ± 0.05**   | 0.92 ± 0.05*    | <b>1.04 ± 0.02*</b>    |                      |
|                                   | $n$                 | 5             | 8               | 9               | 14                     |                      |
| 500ms Ramps (Paired)              | <b>mV</b>           | -49.0 ± 3.6   | -59.7 ± 1.7**   | -57.2 ± 2.5     | <b>-62.4 ± 1.0</b>     |                      |
|                                   | <b>% peak</b>       | -0.9 ± 0.1    | -0.5 ± 0.1**    | -4.6 ± 0.5**    | <b>-3.5 ± 0.5**</b>    |                      |
|                                   | <b>Area (pC/nA)</b> | 1.2 ± 0.2     | 1.1 ± 0.3       | 5.8 ± 0.9**     | <b>2.8 ± 0.3**</b>     |                      |
|                                   | $n$                 | 10            | 10              | 11              | 11                     |                      |
| Frequency dependent rundown 100ms | <b>1 Hz</b>         | $P_1/P_{100}$ | 0.96 ± 0.04     | 0.30 ± 0.01**   | 0.86 ± 0.03**          | <b>0.18 ± 0.01**</b> |
|                                   | $n$                 | 10            | 10              | 10              | 10                     |                      |
|                                   | <b>2 Hz</b>         | $P_1/P_{100}$ | 0.89 ± 0.03     | 0.25 ± 0.01**   | 0.69 ± 0.02**          | <b>0.10 ± 0.01**</b> |
|                                   | $n$                 | 7             | 8               | 8               | 12                     |                      |
| 1.1 Hz ramp train ( $P_{100}$ )   | <b>Area (pC/nA)</b> | 0.30 ± 0.5    | 0.02 ± 0.01*    | 1.12 ± 0.13**   | <b>0.04 ± 0.02**</b>   |                      |
|                                   | $n$                 | 6             | 6               | 6               | 7                      |                      |

Versus WT (DMSO)

\* = P < 0.05

\*\* = P < 0.005

Versus R225P (DMSO)

**Bold** P < 0.05

**Bold, italics** P < 0.005
